# Supplementary material for: BRAFV600E Mutant Allele Frequency (MAF) Influences Melanoma Clinicopathologic Characteristics
Source: MDPI journal article supplement (doi:10.3390/cancers13205073), 2021-10-11
Supplement: s1 [file s1]

# Supplementary Material: *BRAF*<sup>V600E</sup> Mutant Allele Frequency (MAF) Influences Melanoma Clinicopathologic Characteristics

Xavier Soria, Felip Vilardell, Óscar Maiques, Carla Barceló, Pol Sisó, Inés de la Rosa, Ana Velasco, Dolors Cuevas, Maria Santacana, Sònia Gatus, Xavier Matías-Guiu, Alberto Rodrigo, Anna Macià and Rosa M. Martí

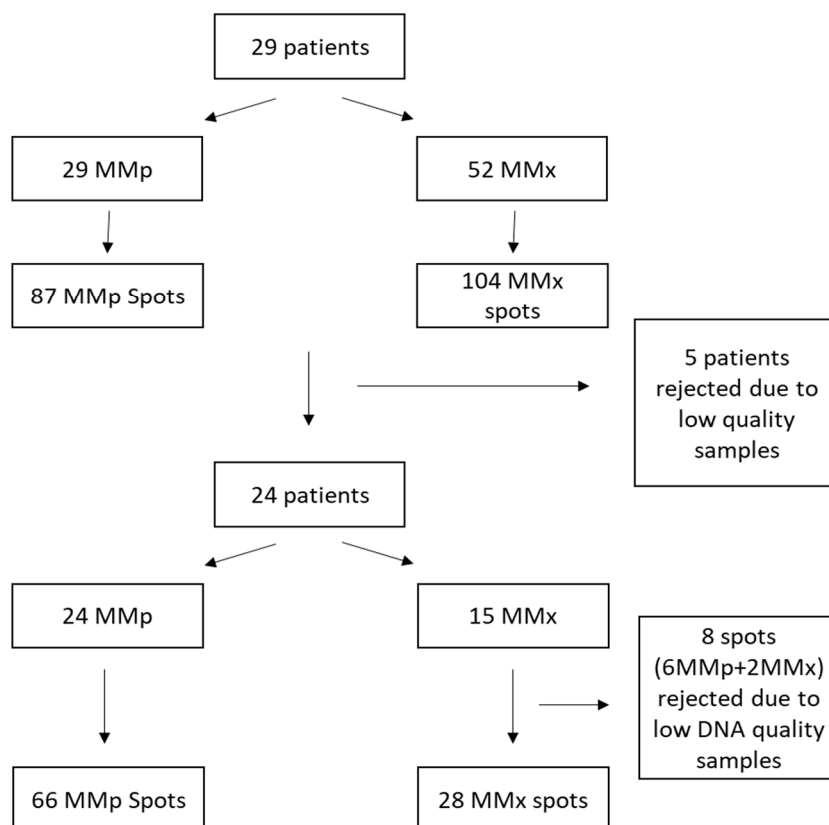

**Figure S1.** Patient selection.

(a)

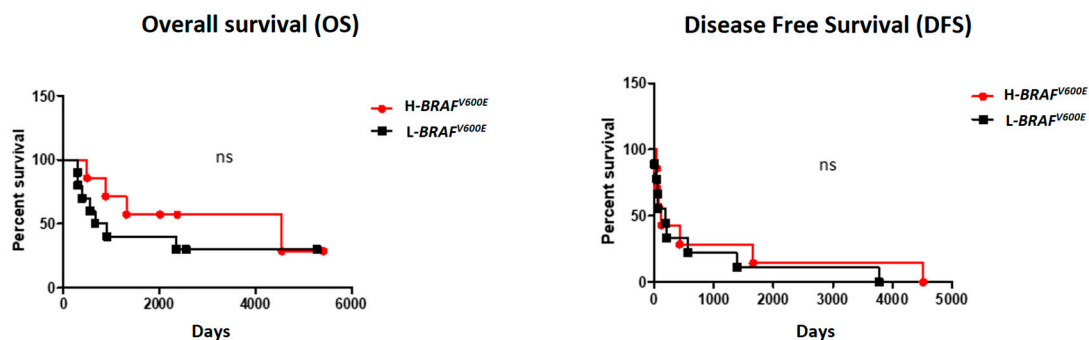

(b)

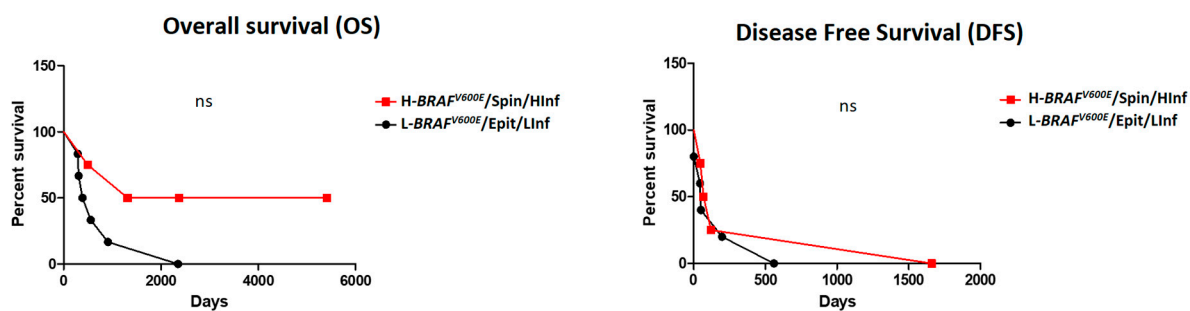

Statistical analysis was performed using the Kaplan-Meier method. (ns: non-significant)

**Figure S2.** (a) Overall survival and disease free survival of patients depending on BRAFV600E MAF variation (high vs. low); (b) Overall survival and disease free survival of H-BRAF<sup>V600E</sup>/Spin/HInf vs. L-BRAF<sup>V600E</sup>/Epit/LInf patients.

**Table S1.** Demographic, clinical and tumor characteristics of our series.

| Case n° | Gender | Age* | MMP subtype | Location      | Breslow index | Clark index | Ulceration | Mitotic index | Driver mutation             | MMx subtype                                  | Treatment                                                              | Dead (months)** | MM as cause of death |
|---------|--------|------|-------------|---------------|---------------|-------------|------------|---------------|-----------------------------|----------------------------------------------|------------------------------------------------------------------------|-----------------|----------------------|
| 1       | M      | 63   | SSM         | Trunk         | 3,81          | 4           | Yes        | 1             | <i>BRAF<sup>V600E</sup></i> | Nodal (regional)<br>Visceral                 | SE+RT (adjuvant)<br>Verumafenib                                        | No (77)         | -                    |
| 2       | M      | 68   | SSM         | Trunk         | 1,30          | 3           | No         | 2             | <i>BRAF<sup>V600E</sup></i> | Nodal (regional)<br>Visceral                 | SE+RT (adjuvant)<br>Palliative                                         | Yes (43)        | Yes                  |
| 3       | M      | 58   | NM          | Trunk         | 3,77          | 4           | No         | 2             | <i>BRAF<sup>V600E</sup></i> | Nodal (regional)                             | SE + IFN (adjuvant)                                                    | No (66)         | -                    |
| 4       | F      | 61   | NM          | Trunk         | 6,23          | 5           | Yes        | 2             | <i>BRAF<sup>V600E</sup></i> | Nodal (regional)<br>Skin(in-transit/distant) | SE+RT (adjuvant)<br>Encorafenib + Binimetinib                          | No (77)         | -                    |
| 5       | M      | 37   | SSM         | Trunk         | 1,67          | 4           | No         | 5             | <i>BRAF<sup>V600E</sup></i> | Nodal (regional)<br>Skin (distant)           | SE + RT (adjuvant)<br>Ipilimumab (1st line);<br>Verumafenib (2nd line) | No (177)        | -                    |
| 6       | M      | 66   | SSM         | Extremities   | 5,20          | 4           | Yes        | 10            | <i>BRAF<sup>V600E</sup></i> | Skin (satellitosis)                          | SE                                                                     | Yes (9)         | No                   |
| 7       | F      | 85   | SSM         | Extremities   | 4,15          | 4           | Yes        | 7             | <i>BRAF<sup>V600E</sup></i> | Skin (satellitosis)<br>Nodal (regional)      | SE                                                                     | Yes (12)        | No                   |
| 8       | M      | 46   | SSM         | Extremities   | 1,12          | 3           | No         | N/A           | <i>BRAF<sup>V600E</sup></i> | Skin (in-transit)                            | Nivolumab                                                              | No (173)        | -                    |
| 9       | F      | 86   | SSM         | Extremities   | 7,30          | 5           | Yes        | 7             | <i>BRAF<sup>V600E</sup></i> | Skin (in-transit)<br>Nodal (regional)        | IC<br>PT                                                               | Yes (29)        | Yes                  |
| 10      | M      | 58   | NM          | Head and neck | 3,80          | 4           | Yes        | 1             | <i>BRAF<sup>V600E</sup></i> | Nodal (regional) -<br>Visceral               | SE+ RT (adjuvant)<br>Verumafenib                                       | Yes (21)        | Yes                  |
| 11      | M      | 24   | SSM         | Head and neck | 4,50          | 4           | Yes        | 10            | <i>BRAF<sup>V600E</sup></i> | Skin (satellitosis/in-transit)<br>Visceral   | SE+RT<br>Nivolumab (1st line)<br>Dabrafenib+<br>Trametinib (2nd line)  | Yes (18)        | Yes                  |
| 12      | M      | 69   | NM          | Trunk         | 5,01          | 4           | Yes        | 4             | <i>NRAS<sup>Q61</sup></i>   | Nodal (regional) -<br>visceral               | SE + RT<br>PT                                                          | Yes (9)         | Yes                  |
| 13      | F      | 81   | SSM         | Extremities   | 1,28          | 4           | No         | 1             | <i>NRAS<sup>Q61</sup></i>   | Skin (in-transit)<br>Visceral                | IC<br>PT                                                               | Yes (24)        | Yes                  |
| 14      | M      | 63   | NM          | Extremities   | 3,88          | 4           | Yes        | 2             | <i>NRAS<sup>Q61</sup></i>   | Nodal (regional)                             | SE + IFN<br>(adjuvant)                                                 | No (91)         | -                    |
| 15      | M      | 63   | NM          | Trunk         | 13.50         | 5           | No         | 11            | <i>NRAS<sup>Q61</sup></i>   | Visceral<br>Skin (regional)                  | IQ                                                                     | Yes (38)        | Yes                  |
| 16      | M      | 70   | NM          | Trunk         | 1.90          | 4           | Yes        | 8             | WT                          | Visceral                                     | SE                                                                     | No (146)        | -                    |
| 17      | F      | 87   | SSM         | Extremities   | 2.17          | 4           | No         | 2             | WT                          | Skin (in-transit)<br>Nodal (regional)        | IC<br>PT                                                               | Yes (34)        | Yes                  |
| 18      | M      | 84   | SSM         | Extremities   | 5.55          | 4           | No         | 4             | <i>BRAF<sup>V600E</sup></i> | Skin (satellitosis)                          | SE                                                                     | Yes (10)        | No                   |
| 19      | F      | 51   | NM          | Trunk         | 3.90          | 4           | No         | 3             | <i>BRAF<sup>V600E</sup></i> | Visceral                                     | SE                                                                     | Yes (28)        | Yes                  |
| 20      | M      | 60   | NM          | Trunk         | 2.30          | 4           | Yes        | 4             | <i>BRAF<sup>V600E</sup></i> | Nodal (regional)<br>Visceral                 | SE<br>Encorafenib + Binimetinib.                                       | Yes (16)        | Yes                  |
| 21      | M      | 61   | SSM         | Extremities   | 3.80          | 4           | Yes        | 3             | <i>BRAF<sup>V600E</sup></i> | Skin (in-transit)                            | SE                                                                     | No (83)         | -                    |

|    |   |    |     |               |       |   |     |    |                             |                             |                          |           |     |
|----|---|----|-----|---------------|-------|---|-----|----|-----------------------------|-----------------------------|--------------------------|-----------|-----|
| 22 | F | 33 | NM  | Trunk         | 1.57  | 3 | No  | 1  | <i>BRAF<sup>V600E</sup></i> | Skin (regional)<br>Visceral | PT                       | Yes (149) | Yes |
| 23 | F | 35 | SSM | Head and neck | 11.15 | 4 | Yes | 10 | <i>BRAF<sup>V600E</sup></i> | Visceral                    | RT + Verumafenib         | Yes (77)  | Yes |
| 24 | M | 65 | SSM | Trunk         | 2.60  | 3 | Yes | 5  | <i>NRAS<sup>Q61</sup></i>   | Nodal (regional)            | SE + RT + IFN (adjuvant) | Yes (44)  | Yes |

SSM: superficial spreading melanoma; NM: nodular melanoma; CNS: central nervous system; SE: Surgical excision; RT: Radiotherapy; IFN: Interferon; N/A: not available; IC: Immunocriotherapy; IQ: Immunochemotherapy (Dacarbazine + gemcitabine + IL-2 + IFN); PT: Palliative treatment. \*age at MMp diagnosis, \*\*months of follow up since MMp diagnosis.

**Table S2.** Distribution of pathological characteristics between MMp and MMx groups.

| Cell Morphology |     |          |     |       |     |      |     | Pigmentation |     |            |     | Lymphocitic infiltrate |     |           |     |            |     |
|-----------------|-----|----------|-----|-------|-----|------|-----|--------------|-----|------------|-----|------------------------|-----|-----------|-----|------------|-----|
| Epithelioid     |     | Spindled |     | Mixed |     | High |     | Moderated    |     | Low/absent |     | High                   |     | Moderated |     | Low/absent |     |
| 50              |     | 16       |     | 28    |     | 46   |     | 28           |     | 20         |     | 10                     |     | 33        |     | 51         |     |
| MMp             | MMx | MMp      | MMx | MMp   | MMx | MMp  | MMx | MMp          | MMx | MMp        | MMx | MMp                    | MMx | MMp       | MMx | MMp        | MMx |
| 32              | 18  | 11       | 5   | 23    | 5   | 36   | 10  | 21           | 7   | 9          | 11  | 4                      | 6   | 21        | 12  | 41         | 10  |
